# Supplementary material for: Crystallographic snapshots of active site metal shift in E. coli fructose 1,6-bisphosphate aldolase
Source: PubMed Central journal article supplement — BMB Rep. 2016 Dec 31;49(12):681–6. doi: 10.5483/BMBRep.2016.49.12.132 (PMC5346313; doi:10.5483/bmbrep.2016.49.12.132), 2016-12-31
Supplement: BMB-49-681_suppl.pdf [file BMB-49-681_suppl.pdf]

## Crystallographic snapshots of active site metal shift in *E. coli* fructose 1,6-bisphosphate aldolase

Huyen-Thi Tran<sup>1‡</sup>Seon-Hwa Lee<sup>2‡</sup>, Thien-Hoang Ho<sup>1, 213</sup>Deok-Kun Oh<sup>2\*</sup> and Lin-Woo Kang<sup>1\*</sup>

<sup>1</sup>Department of Biological Sciences, Konkuk University, Hwayang-dong, Gwangjin-gu, Seoul 143-701, Republic of Korea; <sup>2</sup>Department of Bioscience and Biotechnology, Konkuk University, Seoul 143-701, Korea; <sup>3</sup>Department of Life Science, Sangmyung University, 7 Hongji-dong, Jongno-gu, Seoul 03016, Korea

Running title: *Ligand binding induced metal shift in EcFBA*

To whom correspondence should be addressed:

Dr. Lin-Woo Kang, Department of Biological Sciences, Konkuk University, Seoul 143-701, South Korea, Tel: 82-2-450-4090, Fax: 82-2-444-6707, E-mail: [lkang@konkuk.ac.kr](mailto:lkang@konkuk.ac.kr)

[Dr.](#) Deok-Kun Oh, Department of Bioscience and Biotechnology, Konkuk University, Seoul 143-701, South Korea, E-mail: [deokkun@konkuk.ac.kr](mailto:deokkun@konkuk.ac.kr)

‡These authors contributed equally to this work.

### Supplementary Figure Legends

**Figure S1.** Sequence alignment of class II FBAs from various organisms. *EcFBA* (GI: 16130826) is from *E. coli*; *CjFBA* (GI: 919260097) from *Campylobacter jejuni*, *MtFBA* (GI: 1000901037) from *Mycobacterium tuberculosis*, *GlFBA* (GI: 159119664) from *Giardia lamblia*, and *SaFBA* (GI: 447054585) from *Staphylococcus aureus*. An asterisk (\*) denotes the conserved three His and one Glu residues coordinating the active site metal ion. Secondary structures of core ( $\alpha/\beta$ )<sub>8</sub> barrel fold of FBAs are shaded in pink:  $\beta$ -strand in pink triangle and  $\alpha$ -helix in pink circle. Representative variable loop regions close to the C-terminal side of the core ( $\alpha/\beta$ )<sub>8</sub> barrel are shaded in blue, salmon, and yellow rectangles.

**Figure S2.** Structure comparison of FBAs. A) *Ec*FBA structure (NAT2). A) The NAT1 and NAT2 structures of *Ec*FBA are well conserved (Table S3). B) *G*/FBA structure (PDB ID: 3GB6). C) *Sa*FBA structure (PDB ID: 4TO8). D) Superimposed structures of *Ec*FBA, *G*/FBA, and *Sa*FBA. Overall structure of core ( $\alpha/\beta$ )<sub>8</sub> barrel and two long protruded helices involved in dimerization was well conserved in FBAs. However, the loops connecting the ( $\alpha/\beta$ )<sub>8</sub> barrel showed differences in structures. The representative variable loop regions in Fig. S1 are shaded in circles or ovals with the same color in each structure. The catalytic metal-binding site in each protomer was also represented in red circles.

**Figure S3.** A) Crystal structure of active site of substrate fructose 1,6-bisphosphate-bound *G*/FBA (PDB ID: 3GB6). B) Crystal structure of active site of apo *G*/FBA (PDB ID: 3GAK). C) Crystal structure of active site of citrate-bound *Sa*FBA structure (PDB ID: 4TO8). Zn1 and Zn2 are marked with red and green circles, respectively.

Fig. S1

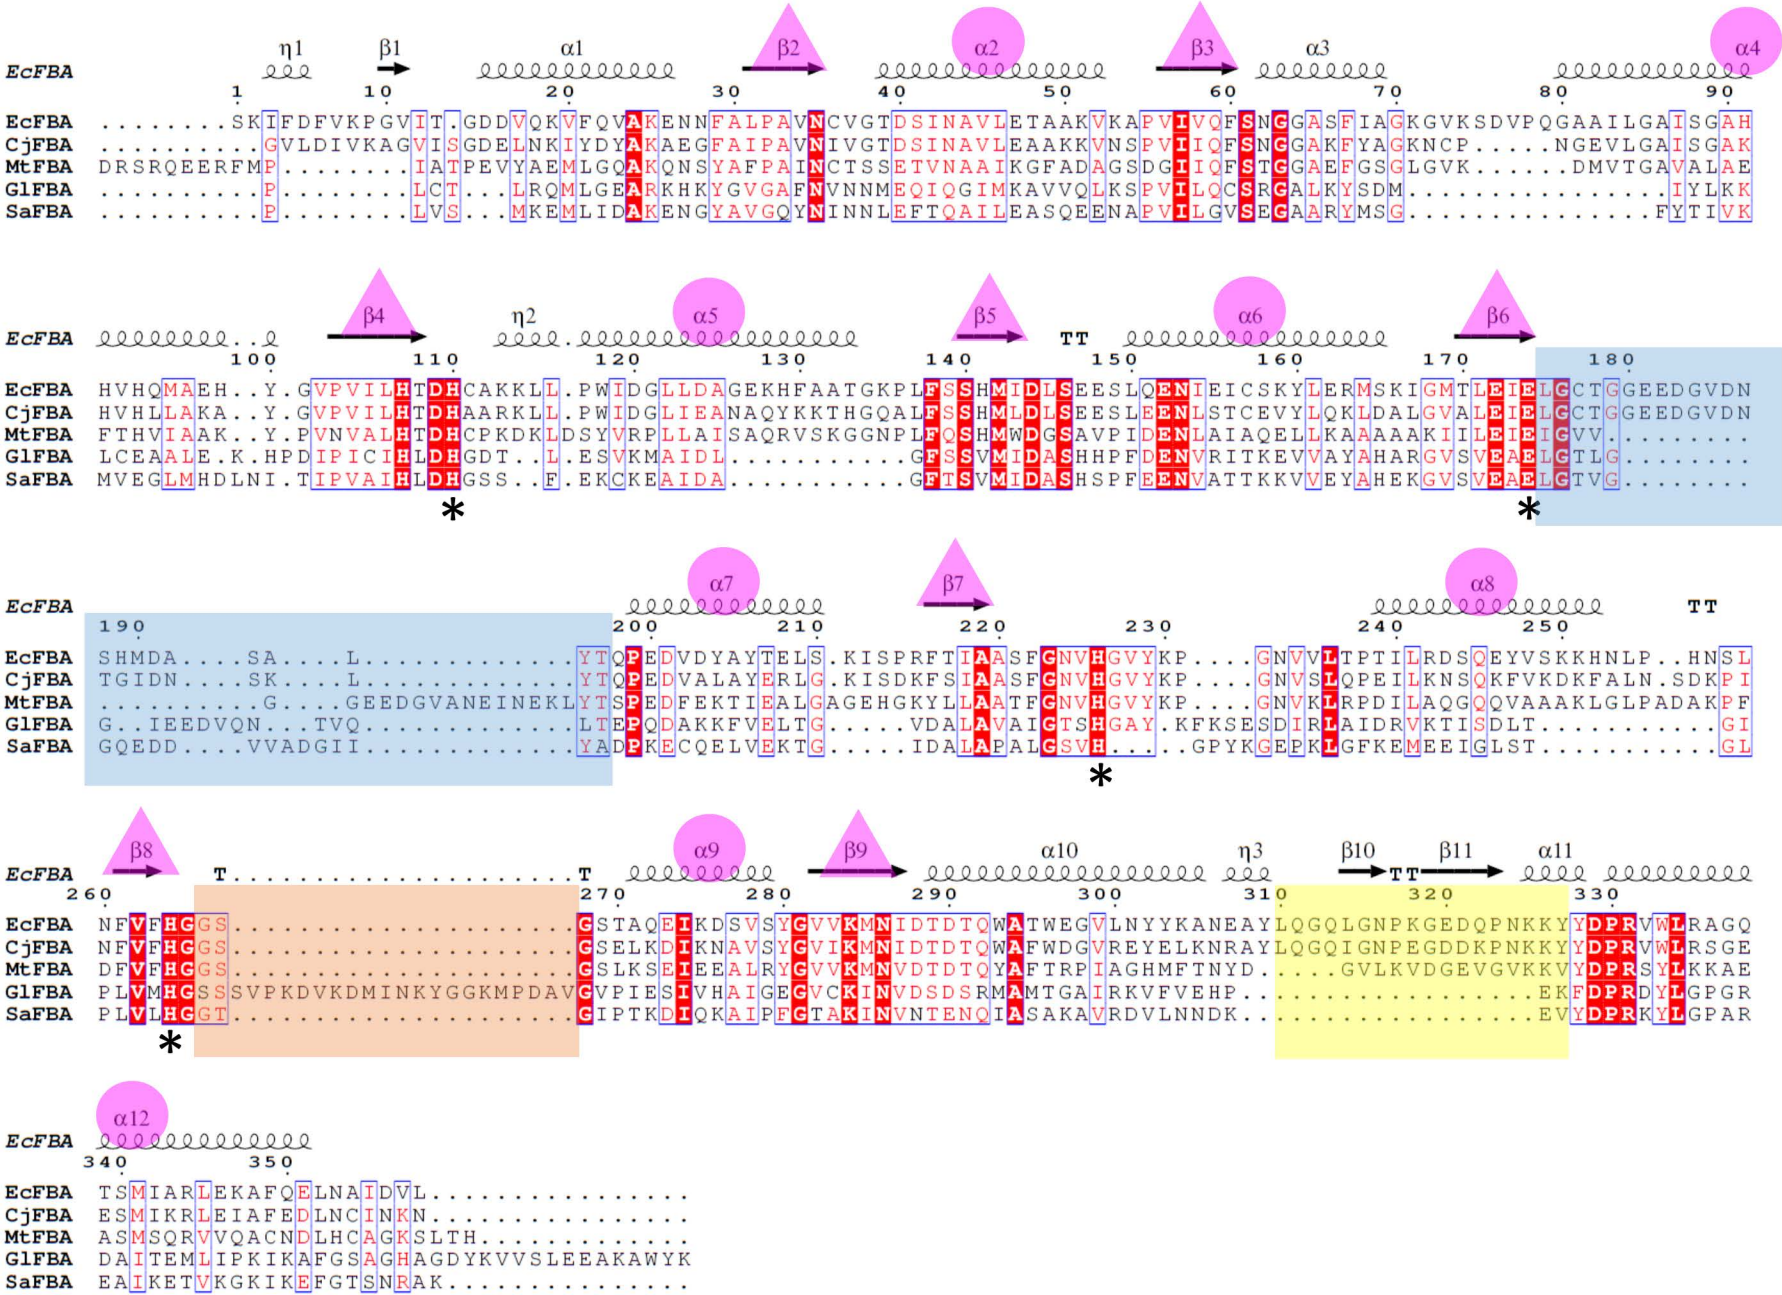

**Fig. S2**

**A**

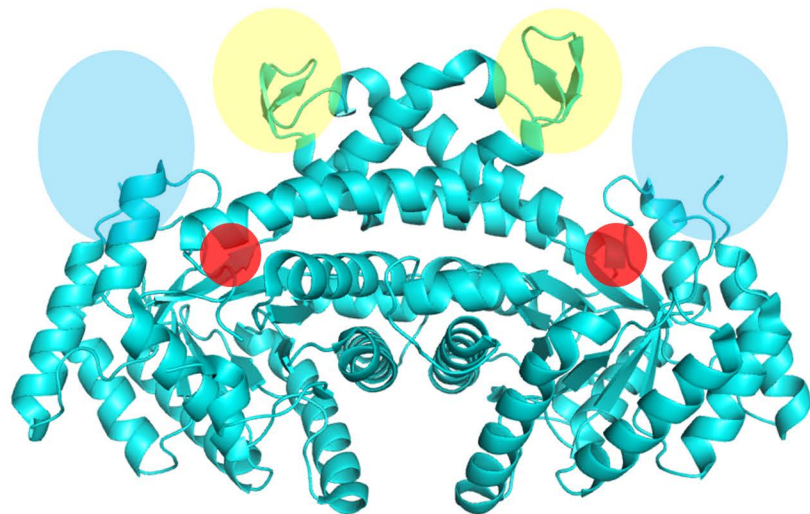

**B**

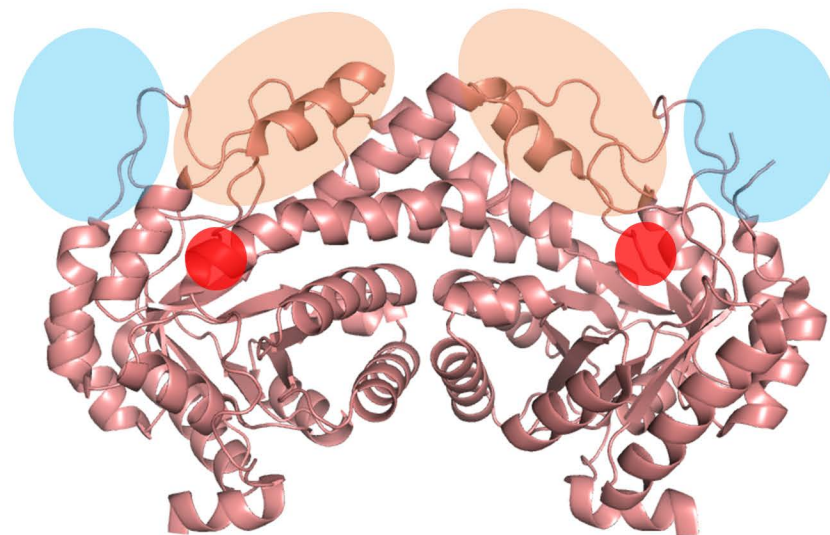

**C**

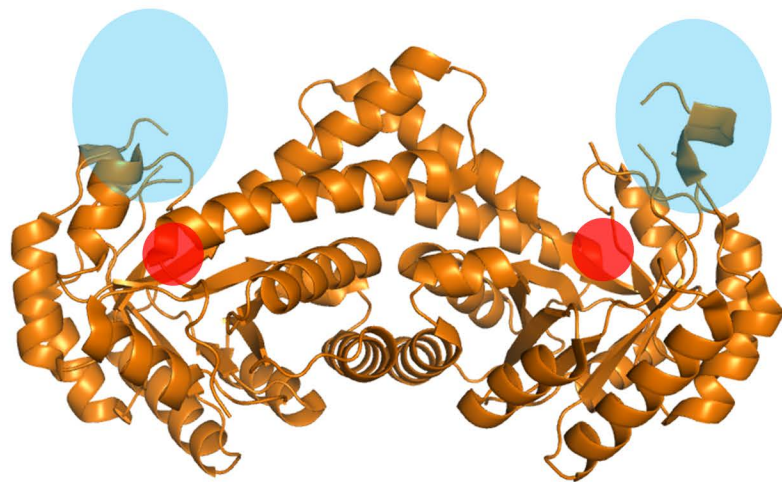

**D**

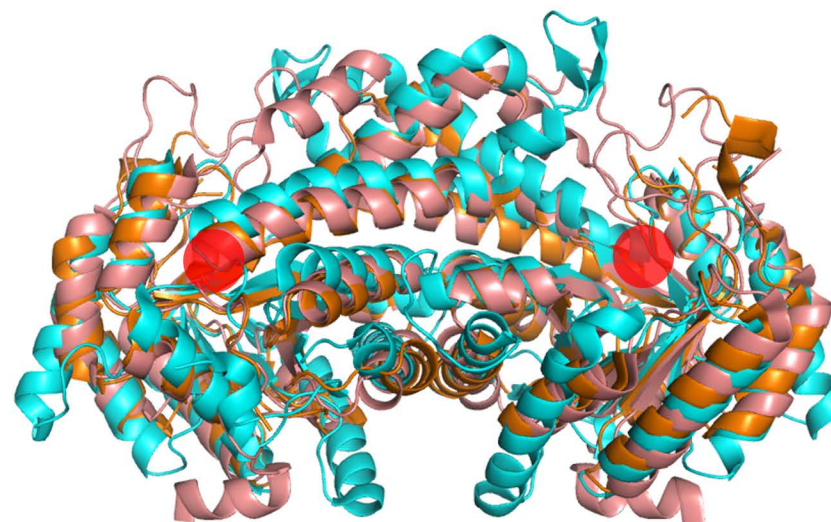

Fig. S3

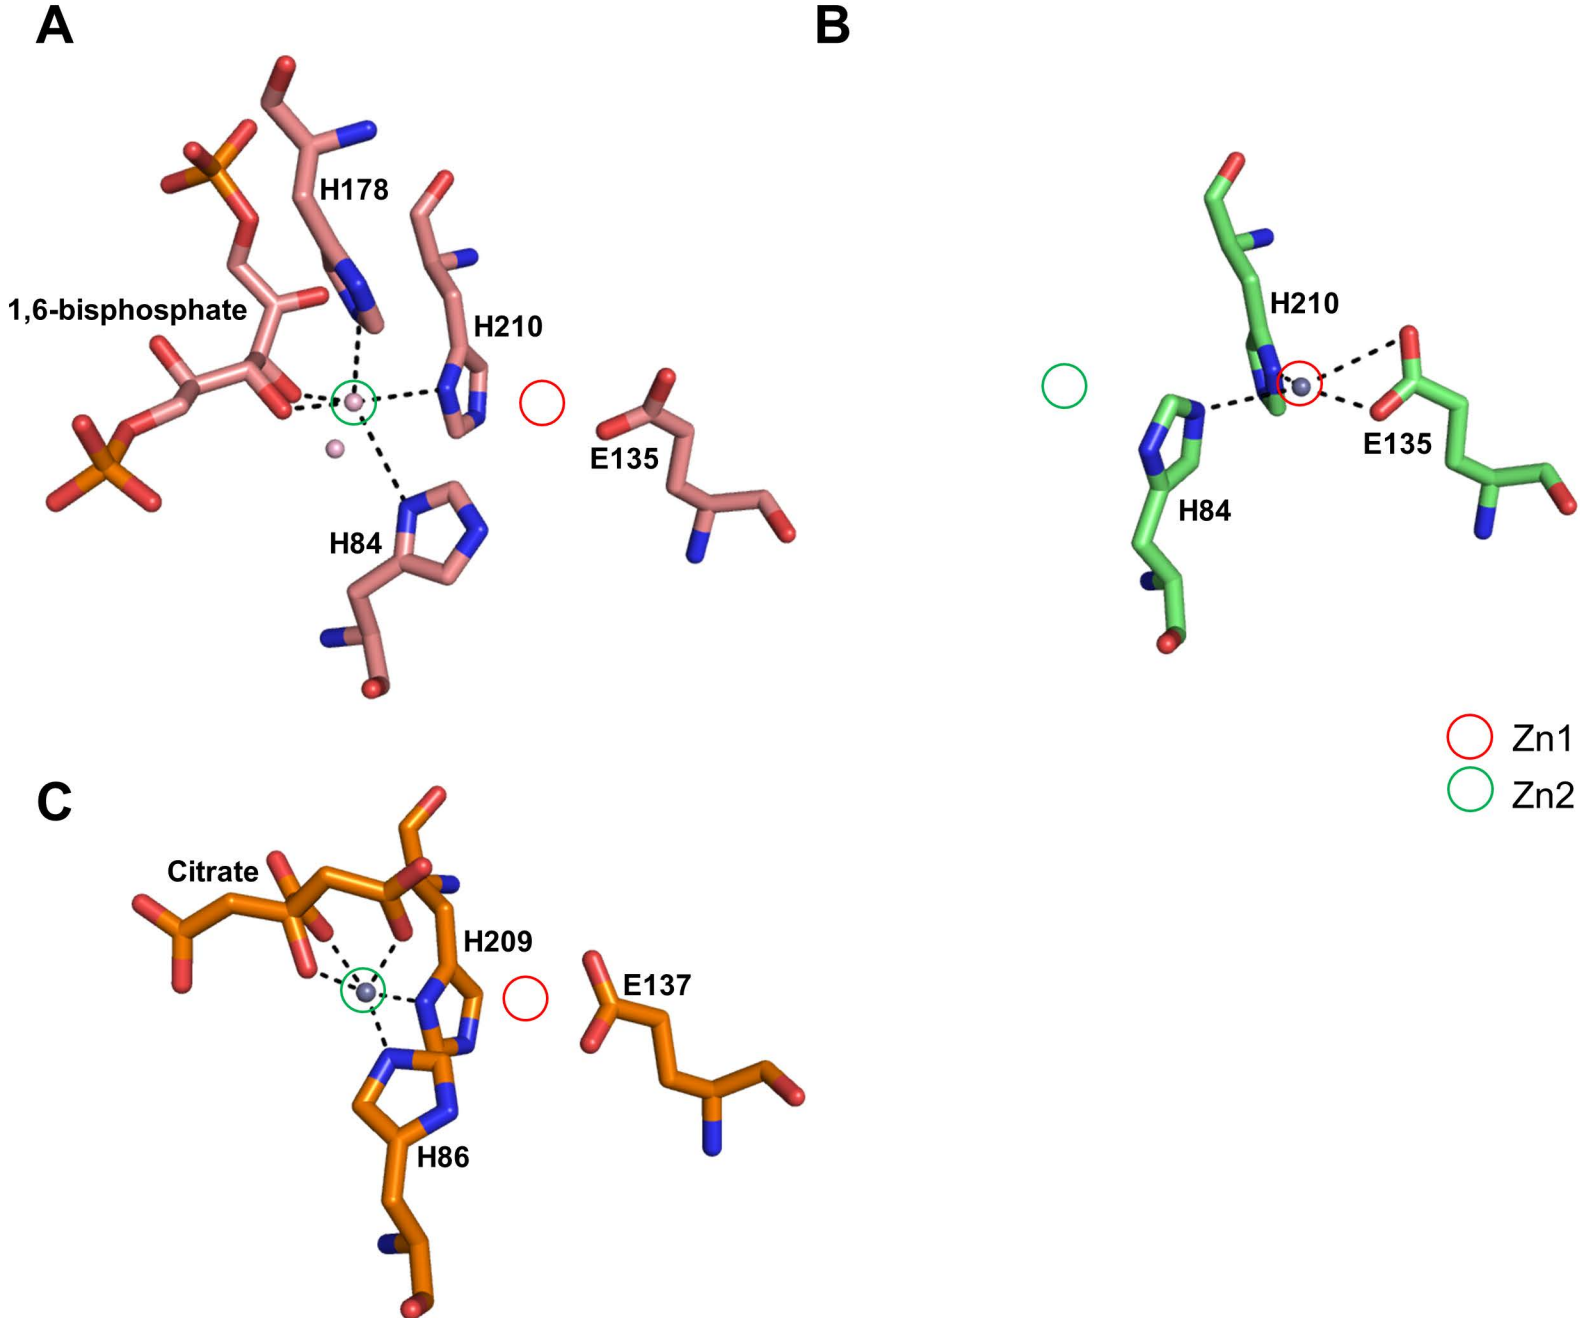

## Supplementary Tables

**Table S1. Data collection and refinement statistics**

| Data                                 | NAT1<br>(1 Zn <sup>2+</sup> at Zn1,<br>and 3 His) | NAT2<br>(2 Zn <sup>2+</sup> at both Zn1 and<br>Zn2, and 2 His) | Citrate-bound<br>(1 Zn <sup>2+</sup> at Zn2,<br>and 2 His) | Tris-bound<br>(1 Zn <sup>2+</sup> at Zn2,<br>and 2 His) |
|--------------------------------------|---------------------------------------------------|----------------------------------------------------------------|------------------------------------------------------------|---------------------------------------------------------|
| Data collection                      |                                                   |                                                                |                                                            |                                                         |
| Protein Data Bank code               | 5GK3                                              | 5GK4                                                           | 5GK6                                                       | 5HK7                                                    |
| Beamline                             |                                                   |                                                                |                                                            |                                                         |
| Wavelength (Å)                       | PAL-5C                                            | PAL-5C                                                         | PAL-5C                                                     | PAL-5C                                                  |
|                                      | 0.979                                             | 0.979                                                          | 0.979                                                      | 0.979                                                   |
| Space group                          | <i>P</i> 2 <sub>1</sub>                           | <i>P</i> 2 <sub>1</sub>                                        | <i>P</i> 2 <sub>1</sub>                                    | <i>P</i> 2 <sub>1</sub>                                 |
| Unit-cell parameters                 |                                                   |                                                                |                                                            |                                                         |
| a, b, c (Å)                          | 72.3, 72.8, 73.4                                  | 73.1, 72.9, 72.5                                               | 72.0, 73.0, 73.0                                           | 72.4, 72.7, 73.1                                        |
| α, β, γ (°)                          | 90.0, 103.1, 90.0                                 | 90.0, 103.2, 90.0                                              | 90.0, 104.1, 90.0                                          | 90.0, 103.2, 90.0                                       |
| Resolution (Å)                       | 50.00-1.80                                        | 50.00-2.00                                                     | 50.00-1.80                                                 | 50.00-1.80                                              |
| Total reflections                    | 357228                                            | 175378                                                         | 405243                                                     | 506459                                                  |
| Unique reflections                   | 68416                                             | 50406                                                          | 67229                                                      | 67264                                                   |
| Completeness (%)                     | 99.9(100.0)                                       | 99.8(100)                                                      | 98.9(99.7)                                                 | 97.7(96.3)                                              |
| Redundancy                           | 5.2(5.2)                                          | 3.5(3.4)                                                       | 6.0(5.3)                                                   | 7.5(7.4)                                                |
| Mean I/σ(I)                          | 36.7(5.2)                                         | 33.8(12.8)                                                     | 29.9(2.3)                                                  | 38.7(5.1)                                               |
| Rmerge (%)                           | 5.4(42.4)                                         | 4.7(13.9)                                                      | 14.5(62.6)                                                 | 6.2(48.8)                                               |
| Refinement                           |                                                   |                                                                |                                                            |                                                         |
| Resolution (Å)                       | 35.7 (1.8)                                        | 36.4 (2.0)                                                     | 32.4 (1.8)                                                 | 36.3 (1.8)                                              |
| Number of reflection<br>(Fo>0 σ(Fo)) |                                                   |                                                                |                                                            |                                                         |
| Working set                          | 68389                                             | 50375                                                          | 67208                                                      | 67235                                                   |
| Free R set                           | 3458                                              | 2561                                                           | 3403                                                       | 3408                                                    |
| R/Rfree (%)c                         | 15.5/ 18.9                                        | 15.2/ 20.0                                                     | 15.7/ 19.4                                                 | 16.2/ 19.8                                              |
| No. atoms                            |                                                   |                                                                |                                                            |                                                         |
| Protein                              | 5,162                                             | 5,098                                                          | 5,173                                                      | 5,124                                                   |
| Ligand/ion                           |                                                   |                                                                |                                                            |                                                         |
| Zn ion                               | 2                                                 | 4                                                              | 2                                                          | 2                                                       |
| Glycerol                             | 3                                                 | 2                                                              | 2                                                          | 1                                                       |
| Di(hydroxyethyl)ether                | 1                                                 | 1                                                              | 1                                                          | 1                                                       |
| Acetate ion                          | N/D                                               | N/D                                                            | N/D                                                        | N/D                                                     |
| Citric acid                          | N/D                                               | N/D                                                            | 2                                                          | N/D                                                     |
| Tris                                 | N/D                                               | N/D                                                            | N/D                                                        | 2                                                       |
| Water                                | 448                                               | 374                                                            | 442                                                        | 291                                                     |
| Mean B factors (Å <sup>2</sup> )     |                                                   |                                                                |                                                            |                                                         |
| Main-chain atoms                     | 20.8                                              | 21.3                                                           | 25.9                                                       | 19.6                                                    |
| Side-chain atoms                     | 26.5                                              | 26.7                                                           | 32.7                                                       | 24.5                                                    |
| Ligand                               |                                                   |                                                                |                                                            |                                                         |
| Zn ion                               | 20.5                                              | 31.5                                                           | 26.8                                                       | 19.2                                                    |
| Glycerol                             | 35.5                                              | 47.1                                                           | N/D                                                        | 33.4                                                    |
| Di(hydroxyethyl)ether                | 25.5                                              | 27.3                                                           | 41.5                                                       | 26.4                                                    |
| Acetate ion                          | N/D                                               | N/D                                                            | N/D                                                        | N/D                                                     |
| Citric acid                          | N/D                                               | N/D                                                            | 38.7                                                       | N/D                                                     |
| Tris                                 | N/D                                               | N/D                                                            | N/D                                                        | 28.9                                                    |
| waters                               | 30.4                                              | 27.3                                                           | 39.0                                                       | 24.5                                                    |
| R.m.s. deviations                    |                                                   |                                                                |                                                            |                                                         |
| Bond lengths (Å)                     | 0.02                                              | 0.02                                                           | 0.024                                                      | 0.02                                                    |
| Bond angles(o)                       | 1.81                                              | 1.84                                                           | 2.00                                                       | 2.00                                                    |
| Ramachandran plot (%)                |                                                   |                                                                |                                                            |                                                         |
| Favored regions                      | 96.8                                              | 98.0                                                           | 97.3                                                       | 97.5                                                    |
| Allowed regions                      | 2.6                                               | 1.7                                                            | 1.9                                                        | 1.8                                                     |
| Outlier regions                      | 0.6                                               | 0.3                                                            | 0.8                                                        | 0.6                                                     |

Values in parentheses are for the highest resolution shell.

$R_{\text{merge}} = \sum_{hkl} \sum_i |I_i(hkl) - \langle I(hkl) \rangle| / \sum_{hkl} \sum_i I_i(hkl)$ , where  $I_i(hkl)$  is the mean intensity of  $i$ th observation of symmetry-related reflections  $hkl$ .  $R_{\text{free}} = \sum_{hkl} ||F_{\text{obs}}| - |F_{\text{calc}}|| / \sum_{hkl} |F_{\text{obs}}|$ , where  $F_{\text{calc}}$  is the calculated protein structure factor from the atomic model ( $R_{\text{free}}$  was calculated with a randomly selected 5% of the reflections).

**Table S2. Metal ion occupancy and coordination of His residues in *Ec*FBA structures**

| Dataset       | Protomers  | Calculated metal occupancy<br>at each site |               | Interpreted metal occupancy<br>at each site |                     |
|---------------|------------|--------------------------------------------|---------------|---------------------------------------------|---------------------|
|               |            | Zn1 occupancy                              | Zn2 occupancy | Zn1 occupancy                               | Zn2 occupancy       |
| NAT1          | Protomer A | 0.67                                       | n/a           | 0.7                                         | n/a (less than 0.3) |
|               | Protomer B | 0.72                                       | n/a           | 0.7                                         | n/a (less than 0.3) |
| NAT2          | Protomer A | 0.48                                       | 0.68          | 0.4                                         | 0.6                 |
|               | Protomer B | 0.60                                       | 0.62          | 0.5                                         | 0.5                 |
| Citrate-bound | Protomer A | n/a                                        | 0.75          | n/a (less than 0.2)                         | 0.8                 |
|               | Protomer B | n/a                                        | 0.73          | n/a (less than 0.3)                         | 0.7                 |
| Tris-bound    | Protomer A | n/a                                        | 0.80          | n/a (less than 0.2)                         | 0.8                 |
|               | Protomer B | n/a                                        | 0.79          | n/a (less than 0.2)                         | 0.8                 |

*Ec*FBA is previously shown to have mutually exclusive two metal binding sites (Blom *et al.*, 1996). Firstly, the metal occupancy of Zn1 and Zn2 was calculated separately. The combined metal occupancy of Zn1 and Zn2 was slightly higher than 1.0. The interpreted metal occupancy was the adjusted occupancy to have the combined occupancy of Zn1 and Zn2 as 1.0. The other metal occupancy was rounded to the first decimal value.

**Table S3. RMSD values (Å) between FBA structures**

|                          | NAT2                | Citrate-bound       | TRIS-bound          | <i>Ec</i> FBA (1DOS) |
|--------------------------|---------------------|---------------------|---------------------|----------------------|
| NAT1<br>(dimer vs dimer) | 0.10<br>in 631 a.a. | 0.16<br>in 631 a.a. | 0.12<br>in 630 a.a. | 0.33<br>in 608 a.a.  |
